# Supplementary material for: Drosophila MIC60/mitofilin conducts dual roles in mitochondrial motility and crista structure
Source: PubMed Central journal article supplement — Mol Biol Cell. 2017 Nov 15;28(24):3471–9. doi: 10.1091/mbc.E17-03-0177 (PMC5683758; doi:10.1091/mbc.e17-03-0177), 2017-11-15

# Supplemental Materials

*Molecular Biology of the Cell*

Tsai et al.

# ***Drosophila* MIC60/Mitofilin Conducts Dual Roles in Mitochondrial Motility and Crista Structure.**

Pei-I Tsai<sup>1,3</sup>, Amanda M. Papakyrikos<sup>1,2,3</sup>, Chung-Han Hsieh<sup>1</sup>, Xinnan Wang<sup>1\*</sup>

1. Department of Neurosurgery, 2. Graduate Program in Developmental Biology, Stanford University School of Medicine, Stanford, CA, U.S.A.

3. Contributed equally

\* Correspondence: xinnanw@stanford.edu

## **Supplementary Figure Legends**

**Figure S1. Phenotypes of dMIC60 RNAi flies.** (A) qRT-PCR results from 48-hr APF pupae. n=9 replicates from 3 independent experiments. (B) Whole cell lysates of third instar larvae were blotted as indicated, for verification of anti-DMiro. (C) HEK cells were immunoprecipitated (IP) with indicated antibodies and the immunoprecipitates were blotted as indicated. The results were repeated three times. (D-G) Quantifications of the normalized bouton number (E), branch number (F), and bouton size (G) at muscle 6/7 hemisegment A2 for *Actin-GAL4* driven knockdown of *dMIC60*. Representative NMJ boutons are shown in confocal stack images in (D) immunostained with anti-HRP. Scale bars: 50  $\mu$ m. For (E-F), n=11-15 NMJs from 11-15 larvae. The muscle sizes are not significantly different between the two genotypes (P=0.5). For bouton size (G), 376-394 boutons were measured from n=4 NMJs from n=4 larvae. (H-I) Bouton number, normalized to muscle size at muscle 6/7 hemisegment A2, for *MHC-GAL4* (H) or *Elav-GAL4* (I) driven knockdown of *dMIC60*. n=8-15 NMJs from n=8-15 larvae. (J) FM1-43 labeling at muscle 4 hemisegment A3 of third instar larvae. The fluorescent intensity was measured and normalized to the mean of the control, "*Actin-GAL4*". n=11-12 NMJs from 8 larvae.

Supplemental Fig. 1

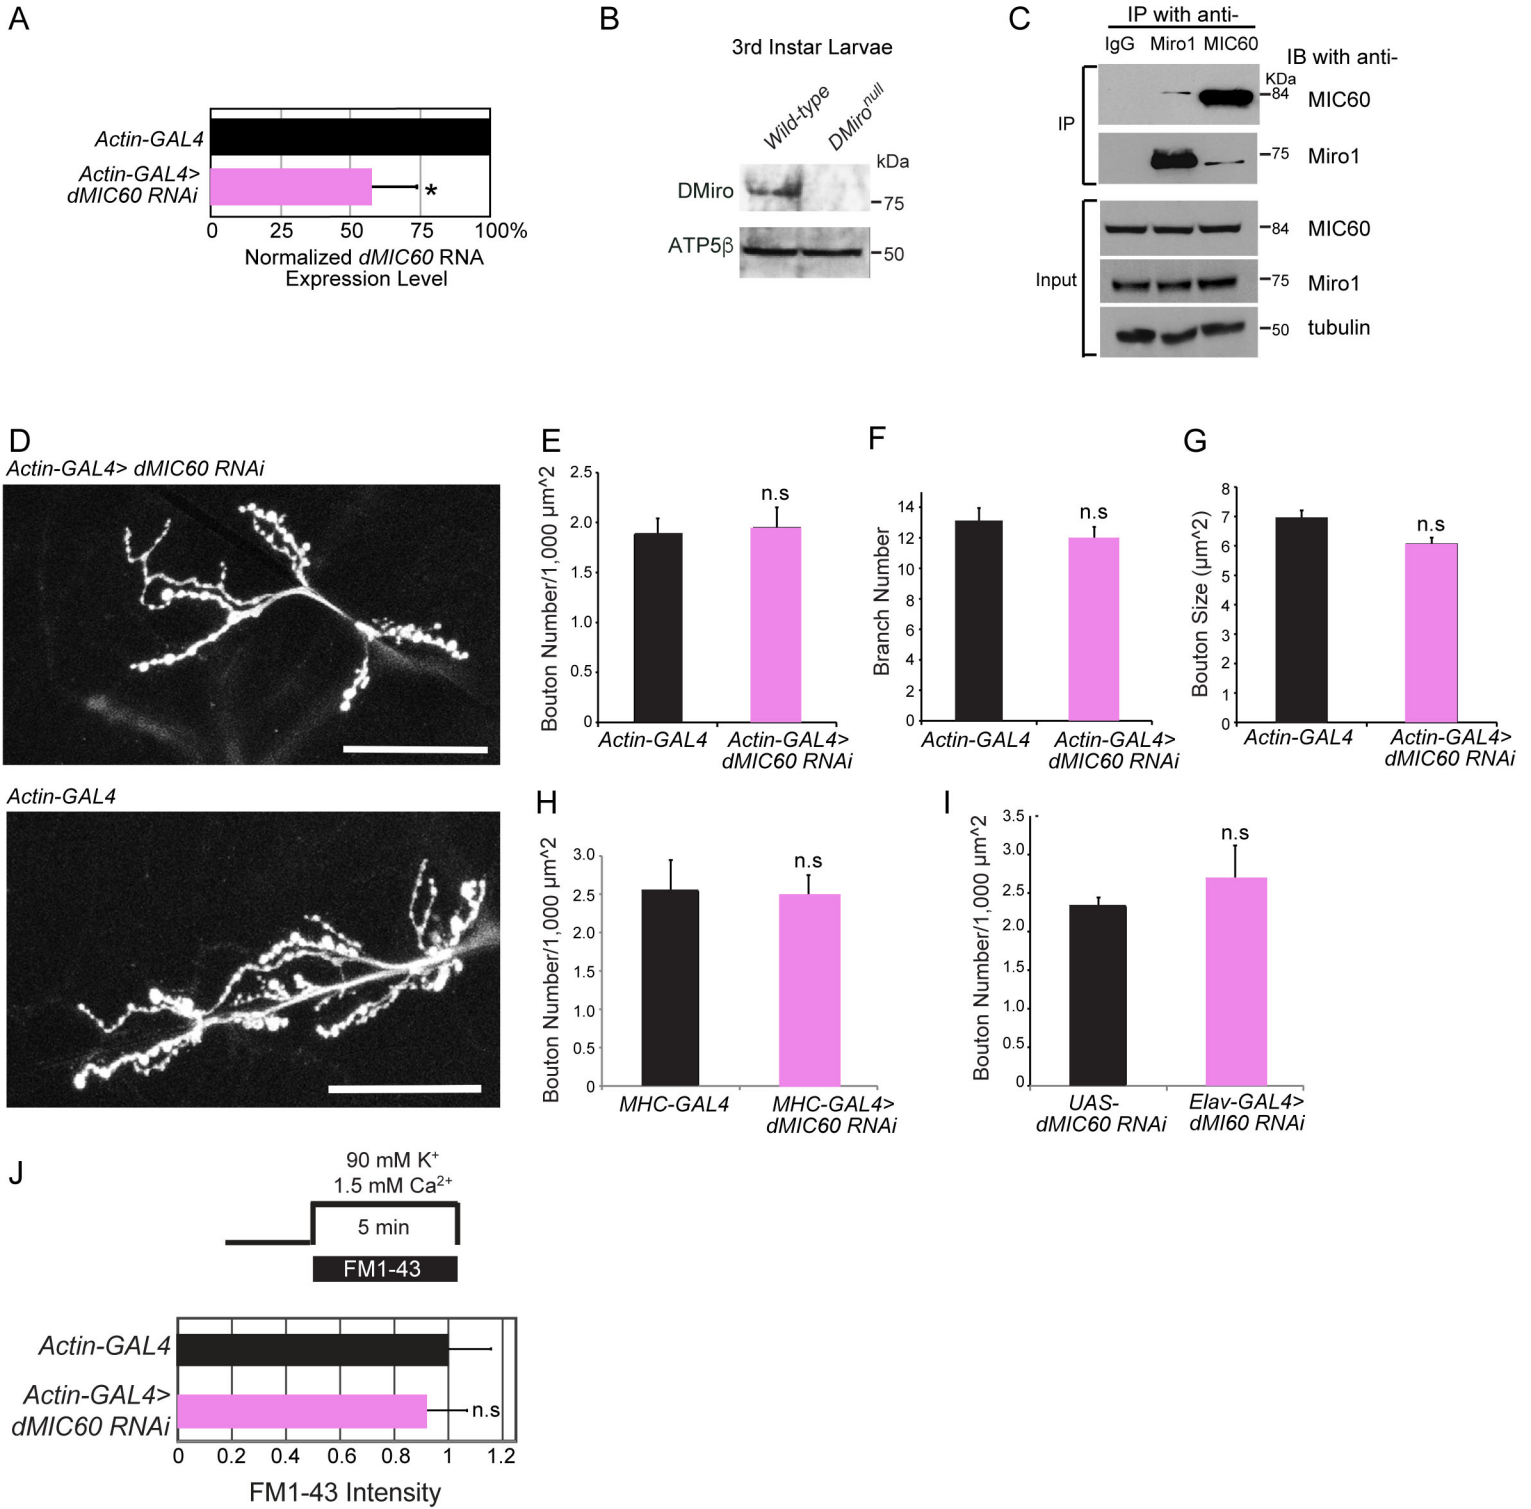

Supplement: supp_E17-03-0177v1_CombinedSupMats.pdf [file supp_E17-03-0177v1_CombinedSupMats.pdf]
